# Supplementary material for: Comparative genomic analysis reveals bilateral breast cancers are genetically independent
Source: PubMed Central journal article supplement (PMC4741642; doi:10.18632/oncotarget.5569), 2015-09-10
Supplement: oncotarget-06-31820-s001.pdf [file oncotarget-06-31820-s001.pdf]

# Comparative genomic analysis reveals bilateral breast cancers are genetically independent

## Supplementary Material

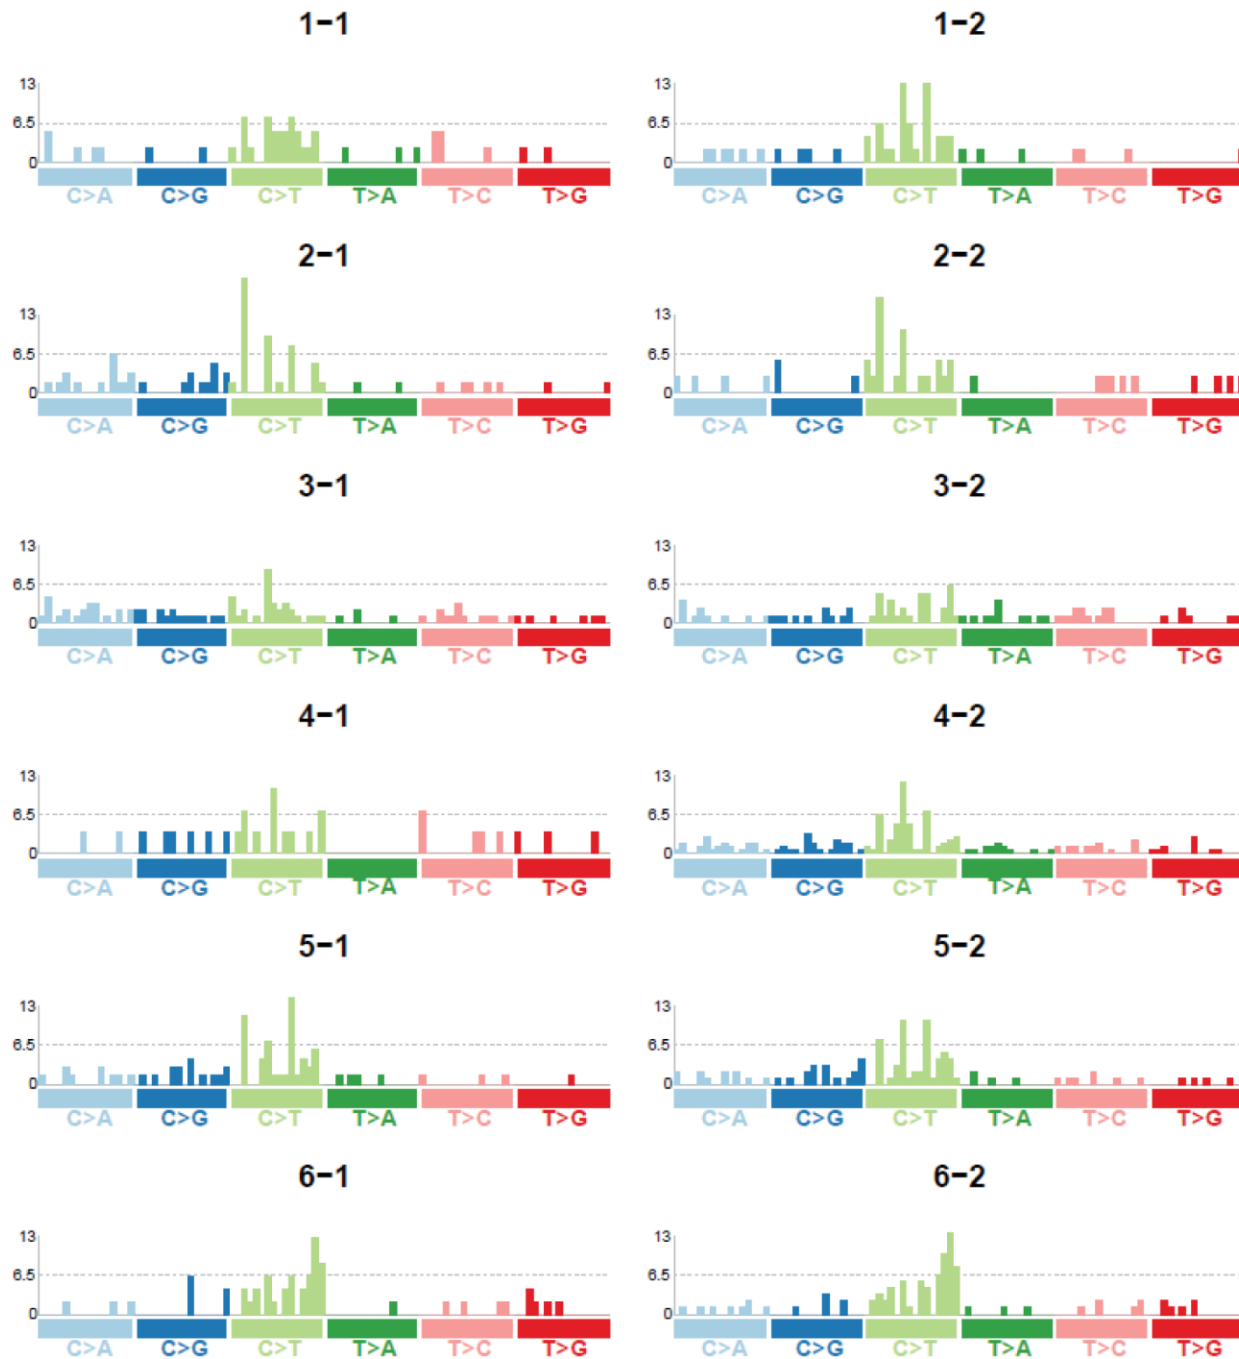

**Supplementary Figure 1. Mutational signatures of the first and second tumors from the six pairs of tumors in the exome-sequencing screen.** The mutational signature is displayed using a 96-substitution classification. The probability bars for each type of substitution are displayed in different colors. The mutation types are displayed on the horizontal axes, and the vertical axes represent the percentage of each type. -1: First tumor, -2: second tumor.

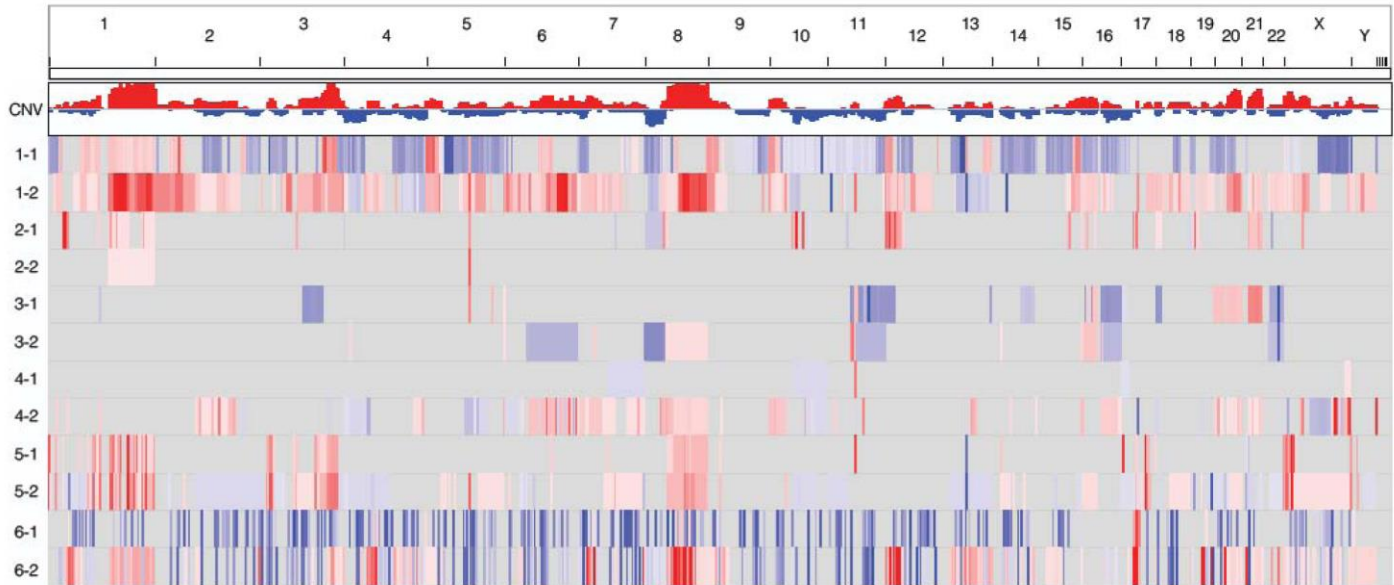

**Supplementary Figure 2. Copy number variations (CNVs) for the first and second tumors from the six pairs of tumors.** Copy number profiles were derived from the Agilent array data and visualized using the Integrative Genomics Viewer (IGV), with red indicating copy number gain and blue representing copy number loss. Each row represents a sample. -1: First tumor, -2: second tumor.

**Supplementary Table 1. Somatic SNVs of exome sequencing data from the first and second tumors of the six pairs of breast cancer tumors<sup>A</sup>**

| Patient ID | Sample <sup>B</sup> | Exonic | Exonic/splicing | ncRNA exonic | ncRNA 3'UTR | Splicing | 3'UTR | 5'UTR | Synonymous | Nonsynonymous | Stop gain | Transversion | Transition | Total |
|------------|---------------------|--------|-----------------|--------------|-------------|----------|-------|-------|------------|---------------|-----------|--------------|------------|-------|
| 1          | 1-1                 | 30     | 2               | 1            | 1           | 0        | 4     | 2     | 7          | 25            | 0         | 12           | 28         | 40    |
|            | 1-2                 | 37     | 1               | 3            | 0           | 0        | 2     | 3     | 14         | 21            | 3         | 14           | 32         | 46    |
| 2          | 2-1                 | 49     | 0               | 2            | 0           | 0        | 7     | 5     | 16         | 28            | 5         | 29           | 34         | 63    |
|            | 2-2                 | 27     | 0               | 1            | 0           | 2        | 5     | 3     | 8          | 16            | 3         | 12           | 26         | 38    |
| 3          | 3-1                 | 62     | 1               | 5            | 0           | 3        | 10    | 10    | 16         | 45            | 2         | 48           | 43         | 91    |
|            | 3-2                 | 56     | 1               | 5            | 0           | 3        | 10    | 6     | 17         | 39            | 1         | 39           | 42         | 81    |
| 4          | 4-1                 | 13     | 0               | 3            | 0           | 2        | 6     | 4     | 5          | 8             | 0         | 11           | 17         | 28    |
|            | 4-2                 | 149    | 3               | 3            | 0           | 3        | 19    | 8     | 51         | 96            | 5         | 79           | 106        | 185   |
| 5          | 5-1                 | 59     | 3               | 1            | 0           | 0        | 3     | 4     | 21         | 39            | 2         | 28           | 42         | 70    |
|            | 5-2                 | 83     | 3               | 2            | 0           | 0        | 3     | 4     | 26         | 54            | 6         | 37           | 58         | 95    |
| 6          | 6-1                 | 44     | 0               | 1            | 0           | 0        | 2     | 0     | 10         | 34            | 0         | 14           | 33         | 47    |
|            | 6-2                 | 82     | 0               | 2            | 0           | 1        | 3     | 1     | 21         | 60            | 1         | 23           | 66         | 89    |

<sup>A</sup>Based on the hg19 UCSC release of the human genome.

<sup>B</sup>“-1”: the first tumor, “-2”: the second tumor.

**Supplementary Table 2. All the shared somatic mutations identified in BBCs**

| Chr   | Start     | End       | Ref | Obs | Function     | Gene      | ExonicFunc        | AAChange                     | Patient ID | SIFT | PolyPhen2 | LJB_PhyloP | LJB_MutationTaster | LJB_LRT |
|-------|-----------|-----------|-----|-----|--------------|-----------|-------------------|------------------------------|------------|------|-----------|------------|--------------------|---------|
| chr4  | 88536901  | 88536901  | C   | T   | exonic       | DSPP      | synonymous SNV    | NM_014208:c.C3087T;p.N1029N  | Patient 1  |      |           |            |                    |         |
| chr8  | 86572500  | 86572500  | G   | A   | UTR3         | REXO1L1   |                   |                              | Patient 1  |      |           |            |                    |         |
| chr20 | 29637986  | 29637986  | T   | A   | ncRNA_exonic | MLLT10P1  |                   |                              | Patient 1  |      |           |            |                    |         |
| chr6  | 136582113 | 136582113 | A   | C   | UTR3         | BCLAF1    |                   |                              | Patient 2  |      |           |            |                    |         |
| chr8  | 144732026 | 144732026 | G   | A   | UTR5         | ZNF623    |                   |                              | Patient 2  |      |           |            |                    |         |
| chr19 | 45395714  | 45395714  | T   | C   | exonic       | TOMM40    | synonymous SNV    | NM_001128917:c.T339C;p.F113F | Patient 2  |      |           |            |                    |         |
| chr20 | 58476774  | 58476774  | G   | A   | exonic       | SYCP2     | synonymous SNV    | NM_014258:c.C1125T;p.D375D   | Patient 2  |      |           |            |                    |         |
| chrX  | 54476149  | 54476149  | A   | G   | exonic       | FGD1      | synonymous SNV    | NM_004463:c.T2091C;p.T697T   | Patient 2  |      |           |            |                    |         |
| chr10 | 21806056  | 21806056  | G   | A   | exonic       | C10orf140 | synonymous SNV    | NM_207371:c.C696T;p.A232A    | Patient 2  |      |           |            |                    |         |
| chr22 | 28194933  | 28194933  | T   | C   | exonic       | MN1       | synonymous SNV    | NM_002430:c.A1599G;p.Q533Q   | Patient 2  |      |           |            |                    |         |
| chr4  | 9783905   | 9783905   | C   | T   | exonic       | DRD5      | synonymous SNV    | NM_000798:c.C252T;p.A84A     | Patient 3  |      |           |            |                    |         |
| chr7  | 116502563 | 116502563 | C   | G   | splicing     | CAPZA2    |                   |                              | Patient 3  |      |           |            |                    |         |
| chr10 | 135054030 | 135054030 | A   | G   | UTR3         | VENTX     |                   |                              | Patient 3  |      |           |            |                    |         |
| chr12 | 11420475  | 11420475  | A   | G   | exonic       | PRB3      | synonymous SNV    | NM_006249:c.T708C;p.P236P    | Patient 3  |      |           |            |                    |         |
| chr1  | 16893827  | 16893827  | C   | A   | exonic       | NBPF1     | nonsynonymous SNV | NM_017940:c.G2686T;p.D896Y   | Patient 4  | 0.01 |           |            |                    |         |
| chr1  | 32661594  | 32661594  | C   | T   | UTR3         | TXLNA     |                   |                              | Patient 4  |      |           |            |                    |         |
| chr3  | 160219839 | 160219839 | T   | C   | UTR3         | KPNA4     |                   |                              | Patient 4  |      |           |            |                    |         |
| chr8  | 86572433  | 86572433  | T   | C   | UTR3         | REXO1L1   |                   |                              | Patient 4  |      |           |            |                    |         |
| chr19 | 54744772  | 54744772  | T   | G   | exonic       | LILRA6    | nonsynonymous SNV | NM_024318:c.A890C;p.Y297S    | Patient 4  | 0.11 | 0.450564  | 0.980991   | 0.059101           | 0.97129 |
| chr19 | 54744777  | 54744777  | C   | T   | exonic       | LILRA6    | synonymous SNV    | NM_024318:c.G885A;p.R295R    | Patient 4  |      |           |            |                    |         |
| chr1  | 159896889 | 159896889 | G   | C   | UTR3         | IGSF9     |                   |                              | Patient 4  |      |           |            |                    |         |

Notes: SIFT, Polyphen2, LJB\_PhyloP, LJB\_MutationTaster and LJB\_LRT are different metrics of predicted functional impact via different strategies. Generally speaking, SIFT < 0.05 is considered that this mutation exerts functional impact; whereas mutation is considered damaging if Polyphen2, LJB\_PhyloP, LJB\_MutationTaster or LJB\_LRT > 0.85.
